# Supplementary material
Source: publisher figshare collection journal article supplement (https://acs.figshare.com/ndownloader/files/4158127)
Supplement: Supplementary file 1 [file 4158127]

## Supporting Information

### Dynamics of Water-induced Surface Reorganization in Poly(methyl methacrylate) Films

Ayanobu Horinouchi,<sup>†</sup> Hironori Atarashi,<sup>†</sup> Yoshihisa Fujii,<sup>†</sup> and Keiji Tanaka<sup>\*,†,‡</sup>

<sup>†</sup>Department of Applied Chemistry and <sup>‡</sup> International Institute for Carbon-Neutral Energy Research  
(WPI-I2CNER), Kyushu University, Fukuoka 819-0395, Japan

E-mail: k-tanaka@cstf.kyushu-u.ac.jp

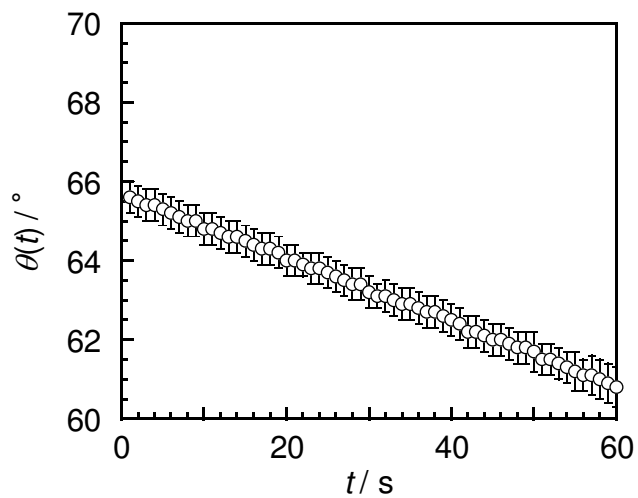

**Figure S1.** Time dependence of water contact angle on a silicon wafer.
